# Supplementary material
Source: ML conference proceedings conference paper supplement (https://openreview.net/forum?id=IwyymRXfzL)
Supplement: supplementary_material [file attachment]

## A Broader impacts and limitations.

In this section, we discuss the broader impacts and limitations of our work.

### A.1 Broader impacts

Automated systems that use human feedback are being used in an increasing number of contexts, spanning everything from predicting user preferences to finetuning language models. It is important to ensure that such systems are as accurate as possible; this naturally requires humans to respond in an accurate and consistent manner. Using the perceptual adjustment query to collect data in such settings could lead to more expressive responses without heavy cognitive burdens on users. Furthermore, providing a user the additional context of a continuous spectrum of items may result in more self-consistent responses. The downstream effects of collecting more expressive and self-consistent human responses could lead to improved models or entirely new paradigms of model development for a myriad of problem settings. With these advantages come associated risks as well. Due to how expressive the responses to PAQs are, the effects of adversarial responses may be magnified. That is, if an adversary purposely chooses to respond in an antagonistic manner, models trained with PAQs may be trained poorly or in opposition to the stated goal. Mitigating such effects likely requires a holistic approach from both the query design and robust model design perspectives.

### A.2 Limitations

From a data collection perspective, the perceptual adjustment query requires access to a continuous space where each point corresponds to an item. In many applications, assuming access to this continuous space is reasonable. For example, if we use PAQs to characterize color blindness, then a natural continuous space is the RGB color space. In general, we situate our data collection within the latent space of a generative model, such as a GAN. While GANs are capable of producing extremely high fidelity images, these images are not always free of semantically meaningful artifacts. Our query design and modeling assumptions do not explicitly consider the case where a portion of the continuous spectrum of items may be corrupted. Furthermore, because our work is an initial exploration into low-rank matrix estimation from inverted measurements, we have not considered scenarios such as unbounded noise or heavier-tailed sensing vectors, and we have not established information-theoretic lower bounds for the inverted measurement paradigm. We hope that further exploration of the inverted measurement paradigm will lead to a rich line of follow-up work.

## B Preliminaries and Notation

In this section, we provide an overview of the key tools that are utilized in our proofs. We first introduce notation which is used throughout our proofs.

**Notation.** For two real numbers  $a$  and  $b$ , let  $a \wedge b = \min\{a, b\}$ . Given a vector  $\mathbf{x} \in \mathbb{R}^d$ , denote  $\|\mathbf{x}\|_1$  and  $\|\mathbf{x}\|_2$  as the  $\ell_1$  and  $\ell_2$  norm, respectively. Denote  $\mathcal{S}^{d-1} := \{\mathbf{x} \in \mathbb{R}^d : \|\mathbf{x}\|_2 = 1\}$  to be the set of vectors with unit  $\ell_2$  norm. Given a matrix  $\mathbf{A} \in \mathbb{R}^{d_1 \times d_2}$ , denote  $\|\mathbf{A}\|_F$ ,  $\|\mathbf{A}\|_*$ , and  $\|\mathbf{A}\|_{\text{op}}$  as the Frobenius norm, nuclear norm, and operator norm, respectively. Denote  $\mathbb{S}^{d \times d} = \{\mathbf{A} \in \mathbb{R}^{d \times d} : \mathbf{A} = \mathbf{A}^\top\}$  to be the set of symmetric  $d \times d$  matrices. Denote  $\mathbf{A} \succeq \mathbf{0}$  to mean  $\mathbf{A}$  is symmetric positive semi-definite. For  $\mathbf{A} \succeq \mathbf{0}$ , define the (pseudo-) inner product  $\langle \mathbf{x}, \mathbf{y} \rangle_{\mathbf{A}} = \mathbf{x}^\top \mathbf{A} \mathbf{y}$  and the associated (pseudo-) norm  $\|\mathbf{x}\|_{\mathbf{A}} = \sqrt{\mathbf{x}^\top \mathbf{A} \mathbf{x}}$ . For matrices  $\mathbf{A}, \mathbf{B} \in \mathbb{R}^{d_1 \times d_2}$ , denote  $\langle \mathbf{A}, \mathbf{B} \rangle = \text{tr}(\mathbf{A}^\top \mathbf{B})$  as the Frobenius inner product.

We use the notation  $f(x) \lesssim g(x)$  to denote that there exists some universal positive constant  $c > 0$ , such that  $f(x) \leq c \cdot g(x)$ , and use the notation  $f(x) \gtrsim g(x)$  when  $g(x) \lesssim f(x)$ .

We define random matrices

$$\bar{\mathbf{A}} = \gamma^2 \mathbf{a} \mathbf{a}^\top = \frac{\mathbf{y} + \bar{\eta}}{\mathbf{a}^\top \Sigma^* \mathbf{a}} \mathbf{a} \mathbf{a}^\top \quad (13)$$

and

$$\tilde{\mathbf{A}} = \gamma^2 \mathbf{a} \mathbf{a}^\top = \left( \frac{\mathbf{y} + \bar{\eta}}{\mathbf{a}^\top \Sigma^* \mathbf{a}} \wedge \tau \right) \mathbf{a} \mathbf{a}^\top \quad (14)$$

as the sensing matrix formed with the  $m$ -averaged responses  $\bar{\gamma}$  and truncated responses  $\tilde{\gamma}$ , respectively.

### B.1 Inverted measurement sensing matrices result in estimation bias.

Recall from Equation (4) that the random sensing matrix  $\mathbf{A}^{\text{inv}}$  takes the form

$$\mathbf{A}^{\text{inv}} = \frac{\mathbf{y} + \boldsymbol{\eta}}{\mathbf{a}^\top \boldsymbol{\Sigma}^* \mathbf{a}} \mathbf{a} \mathbf{a}^\top. \quad (15)$$

Standard trace regression analysis requires that the bias term  $\mathbb{E}[\boldsymbol{\eta} \mathbf{A}] = \mathbf{0}$ , typically by assuming (at least) that  $\boldsymbol{\eta}$  is zero-mean conditioned on the sensing matrix  $\mathbf{A}$ . The following lemma shows that the bias term associated with the inverted measurements sensing matrix  $\mathbf{A}^{\text{inv}}$  is nonzero, resulting in biased estimation

**Lemma 1.** *Let  $\mathbf{A}^{\text{inv}}$  be the random matrix defined in Eq. (4) and  $\boldsymbol{\eta}$  be the measurement noise. Then,*

$$\mathbb{E}[\boldsymbol{\eta} \mathbf{A}^{\text{inv}}] \neq \mathbf{0}. \quad (16)$$

The proof of Lemma 1 is provided in Appendix B.6.1. As a result, utilizing established low-rank matrix estimators will result in biased estimation.

### B.2 Sub-exponential random variables.

Our analysis will depend on sub-exponential random variables, a class of random variables with heavier tails than Gaussian. While many definitions of sub-exponential random variables exist (see, for example, [43] Chapter 2.7), we will make use of one particular property, presented below.

If  $X$  is a sub-exponential random variable, then there exists some constant  $c$  (only dependent on the distribution underlying the random variable  $X$ ) such that for all integers  $p \geq 1$ ,

$$(\mathbb{E}|X|^p)^{1/p} \leq cp. \quad (17)$$

### B.3 Bernstein's inequality.

A key ingredient in our proofs is the well-known Bernstein's inequality, which is a concentration inequality for sums of independent sub-exponential random variables.

**Lemma 2** (Bernstein's inequality, adapted from [44] Theorem 2.10). *Let  $X_1, \dots, X_n$  be independent real-valued random variables. Assume exist positive numbers  $u_1$  and  $u_2$  such that*

$$\mathbb{E}[X_i^2] \leq u_1 \quad \text{and} \quad \mathbb{E}[|X_i|^p] \leq \frac{p!}{2} u_1 u_2^{p-2} \text{ for all integers } p \geq 2, \quad (18a)$$

Then for all  $t > 0$ ,

$$\mathbb{P}\left(\left|\frac{1}{n} \sum_{i=1}^n (X_i - \mathbb{E}[X_i])\right| \geq \sqrt{\frac{2u_1 t}{n}} + \frac{u_2 t}{n}\right) \leq 2 \exp(-t). \quad (18b)$$

### B.4 Moments of the ratios of quadratic forms.

Because the quadratic term  $\mathbf{a}^\top \boldsymbol{\Sigma}^* \mathbf{a}$  appears in the denominator of our sensing matrices, our analysis depends on quantifying the moments of the ratios of quadratic forms. This is done in the following lemma.

**Lemma 3.** *There exists an absolute constant  $c > 0$  such that the following is true. Let  $\mathbf{a} \sim \mathcal{N}(\mathbf{0}, \mathbf{I}_d)$ ,  $\boldsymbol{\Sigma}^* \in \mathbb{R}^{d \times d}$  be any PSD matrix with rank  $r$ , and  $\mathbf{U} \in \mathbb{R}^{d \times d}$  be an arbitrary symmetric matrix.*

(a) *Suppose that  $r > 8$ . Then we have*

$$\mathbb{E}\left(\frac{1}{\mathbf{a}^\top \boldsymbol{\Sigma}^* \mathbf{a}}\right)^4 \leq \frac{c}{\sigma_r^4 r^4}.$$

(b) *Suppose that  $r > 2$ . Then we have*

$$\mathbb{E}\left(\frac{\mathbf{a}^\top \mathbf{U} \mathbf{a}}{\mathbf{a}^\top \boldsymbol{\Sigma}^* \mathbf{a}}\right) \leq \frac{c}{\sigma_r r} \|\mathbf{U}\|_*. \quad (19)$$

The proof of Lemma 3 is presented in Appendix B.6.2.

539 **B.5 A fourth moment bound for  $\bar{\gamma}^2$ .**

540 Throughout our analysis, we will utilize the fact that  $\bar{\gamma}^2$  has a bounded fourth-moment. This bound is  
 541 characterized in the following lemma.

542 **Lemma 4.** *Assume  $r > 8$ . Then the bound*

$$\mathbb{E} \left[ (\bar{\gamma}^2)^4 \right] \lesssim \left( \frac{y + \eta^\uparrow}{\sigma_r r} \right)^4 \quad (20)$$

543 holds, where  $\sigma_r$  is the smallest non-zero singular value of  $\Sigma^*$ .

544 The proof of Lemma 4 is presented in Appendix B.6.3. For notational simplicity of the proofs, we  
 545 denote  $M = c \left( \frac{y + \eta^\uparrow}{\sigma_r r} \right)^4$ .

546 **B.6 Proofs of preliminary lemmas**

547 In this section, we present proofs for preliminary lemmas from Appendices B.1, B.4, and B.5.

548 **B.6.1 Proof of Lemma 1**

549 We show that  $\mathbb{E} [\eta \mathbf{A}^{\text{inv}}] \neq \mathbf{0}$ . Using the independence of  $\eta$  and  $\mathbf{a}$  and the assumption that  $\eta$  is zero  
 550 mean, we have

$$\mathbb{E} [\eta \mathbf{A}^{\text{inv}}] = \mathbb{E} \left[ \frac{\eta(y + \eta)}{\mathbf{a}^\top \Sigma^* \mathbf{a}} \mathbf{a} \mathbf{a}^\top \right] \quad (21)$$

$$= \mathbb{E} [\eta(y + \eta)] \mathbb{E} \left[ \frac{1}{\mathbf{a}^\top \Sigma^* \mathbf{a}} \mathbf{a} \mathbf{a}^\top \right] \quad (22)$$

$$= \nu_\eta^2 \mathbb{E} \left[ \frac{1}{\mathbf{a}^\top \Sigma^* \mathbf{a}} \mathbf{a} \mathbf{a}^\top \right]. \quad (23)$$

551 This expectation is non-zero, as the random matrix  $\frac{1}{\mathbf{a}^\top \Sigma^* \mathbf{a}} \mathbf{a} \mathbf{a}^\top$  is symmetric-positive semidefinite.

552 Therefore, we have  $\mathbb{E} [\eta \mathbf{A}^{\text{inv}}] \neq \mathbf{0}$ , as desired.

553 **B.6.2 Proof of Lemma 3**

554 Without loss of generality, we assume that  $\Sigma^*$  is diagonal for the remainder of this proof. To prove  
 555 each part of Lemma 3, we utilize results on the moments of ratios of quadratic forms. For non-negative  
 556 integers  $p$  and  $q$ , we first verify that the mixed moment  $\mathbb{E} \left[ \frac{(\mathbf{a}^\top \mathbf{U} \mathbf{a})^p}{(\mathbf{a}^\top \Sigma^* \mathbf{a})^q} \right]$  exists. By [45, Proposition 1],  
 557 the mixed moment exists if  $\frac{p}{2} > q$ . This is assumed to be true for all parts of Lemma 3.

558 By [45, Proposition 2], we have the following expression for the mixed moment  $\mathbb{E} \left[ \frac{(\mathbf{a}^\top \mathbf{U} \mathbf{a})^p}{(\mathbf{a}^\top \Sigma^* \mathbf{a})^q} \right]$ :

$$\mathbb{E} \left[ \frac{(\mathbf{a}^\top \mathbf{U} \mathbf{a})^p}{(\mathbf{a}^\top \Sigma^* \mathbf{a})^q} \right] = \frac{1}{\Gamma(q)} \int_0^\infty t^{q-1} |\Delta_t| \mathbb{E} \left[ (\mathbf{a}^\top \Delta_t \mathbf{U} \Delta_t \mathbf{a})^p \right] dt, \quad (24)$$

559 where  $\Delta_t = (\mathbf{I}_d + 2t\Sigma^*)^{-1/2}$  and  $|\Delta_t|$  is the determinant of  $\Delta_t$ . Our results will depend on  
 560 characterizing  $|\Delta_t|$ . We begin by noting that  $\Delta_t$  is a diagonal matrix of the following form

$$\Delta_t = \begin{bmatrix} \frac{1}{(1+2t\sigma_1)^{1/2}} & & & & \\ & \ddots & & & \\ & & \frac{1}{(1+2t\sigma_r)^{1/2}} & & \\ & & & 1 & \\ & & & & \ddots & \\ & & & & & 1 \end{bmatrix}. \quad (25)$$

561 It follows that the determinant  $|\Delta_t|$  can be written as the product  $|\Delta_t| = \prod_{j=1}^r \frac{1}{(1+2t\sigma_j)^{1/2}}$ . Further-  
 562 more, this product can be bounded as follows:

$$\frac{1}{(1+2t\sigma_1)^{r/2}} \leq |\Delta_t| \leq \frac{1}{(1+2t\sigma_r)^{r/2}}. \quad (26)$$

563 We are now ready to prove parts (a) and (b).

564 **Part (a).** This case corresponds to the case where  $p = 0$  and  $q = 4$ . Using the integral expres-  
 565 sion (24) and upper bound on determinant (26), with these values of  $p$  and  $q$ , we have

$$\mathbb{E} \left[ \left( \frac{1}{\mathbf{a}^\top \Sigma^* \mathbf{a}} \right)^4 \right] = \frac{1}{\Gamma(4)} \int_0^\infty t^3 |\Delta_t| dt \quad (27)$$

$$\leq \frac{1}{\Gamma(4)} \int_0^\infty t^3 \frac{1}{(1+2t\sigma_r)^{r/2}} dt \quad (28)$$

566 Making the substitution  $s = 1 + 2t\sigma_r$ , we can evaluate the integral as follows.

$$\mathbb{E} \left[ \left( \frac{1}{\mathbf{a}^\top \Sigma^* \mathbf{a}} \right)^4 \right] \leq \frac{1}{2\Gamma(4)\sigma_r} \int_1^\infty \left( \frac{s-1}{2\sigma_r} \right)^3 \frac{1}{s^{r/2}} ds \quad (29)$$

$$\lesssim \frac{1}{\sigma_r^4} \int_1^\infty \frac{(s-1)^3}{s^{r/2}} ds \quad (30)$$

$$= \frac{1}{\sigma_r^4} \int_1^\infty \left( \frac{s^3}{s^{r/2}} - 3 \frac{s^2}{s^{r/2}} + 3 \frac{s}{s^{r/2}} - \frac{1}{s^{r/2}} \right) ds \quad (31)$$

$$= \frac{1}{\sigma_r^4} \left( \frac{2}{r-8} - \frac{6}{r-6} + \frac{6}{r-4} - \frac{2}{r-2} \right). \quad (32)$$

567 Therefore, we have that there exists some absolute constant  $c$  such that

$$\mathbb{E} \left[ \left( \frac{1}{\mathbf{a}^\top \Sigma^* \mathbf{a}} \right)^4 \right] \leq \frac{c}{\sigma_r^4 r^4}, \quad (33)$$

568 as desired.

569 **Part (b).** This case corresponds to the case where  $p = q = 1$ . We begin again with the integral  
 570 expression (24) and upper bound on determinant (26):

$$\mathbb{E} \left[ \left( \frac{\mathbf{a}^\top U \mathbf{a}}{\mathbf{a}^\top \Sigma^* \mathbf{a}} \right) \right] = \frac{1}{\Gamma(1)} \int_0^\infty |\Delta_t| \mathbb{E} [\mathbf{a}^\top \Delta_t U \Delta_t \mathbf{a}] dt \quad (34)$$

$$\leq \frac{1}{\Gamma(1)} \int_0^\infty \frac{1}{(1+2t\sigma_r)^{r/2}} \mathbb{E} [\mathbf{a}^\top \Delta_t U \Delta_t \mathbf{a}] dt \quad (35)$$

571 We now bound the expectation term  $\mathbb{E} [\mathbf{a}^\top \Delta_t U \Delta_t \mathbf{a}]$ . Note that for  $\mathbf{a} \sim \mathcal{N}(\mathbf{0}, \mathbf{I}_d)$ , the expectation  
 572  $\mathbb{E} [\mathbf{a}^\top \mathbf{B} \mathbf{a}] = \text{tr}(\mathbf{B})$  for any symmetric matrix  $\mathbf{B}$ . Therefore, we have

$$\mathbb{E} [\mathbf{a}^\top \Delta_t U \Delta_t \mathbf{a}] = \text{tr}(\Delta_t U \Delta_t) \quad (36)$$

$$\leq \|\Delta_t U \Delta_t\|_*. \quad (37)$$

573 Above, we have used the fact that  $\text{tr}(\mathbf{B}) \leq \|\mathbf{B}\|_*$  for any symmetric matrix  $\mathbf{B}$ . By Hölder's  
 574 inequality for Schatten- $p$  norms, we have that  $\|\Delta_t U \Delta_t\|_* \leq \|\Delta_t\|_{\text{op}}^2 \|U\|_*$ . Because  $\Delta_t$  is diagonal

575 and the entries of  $\Delta_t$  are bounded between 0 and 1, we can bound the operator norm as  $\|\Delta_t\|_{\text{op}} \leq 1$ .  
 576 Therefore

$$\mathbb{E} [\mathbf{a}^\top \Delta_t \mathbf{U} \Delta_t \mathbf{a}] \leq \|\mathbf{U}\|_* \quad (38)$$

577 Substituting this upper bound for the expectation term into the integral, we obtain

$$\mathbb{E} \left[ \frac{\mathbf{a}^\top \mathbf{U} \mathbf{a}}{\mathbf{a}^\top \Sigma^* \mathbf{a}} \right] \leq \|\mathbf{U}\|_* \int_0^\infty \frac{1}{(1 + 2t\sigma_j)^{r/2}} dt. \quad (39)$$

578 Evaluating this integral, we have for some absolute constant  $c$ ,

$$\mathbb{E} \left[ \frac{\mathbf{a}^\top \mathbf{U} \mathbf{a}}{\mathbf{a}^\top \Sigma^* \mathbf{a}} \right] \leq \frac{c}{\sigma_r r} \|\mathbf{U}\|_*, \quad (40)$$

579 as desired.

### 580 B.6.3 Proof of Lemma 4

581 By the bounded noise assumption,  $y + \bar{\eta} \leq y + \eta^\uparrow$ . Therefore, we have

$$\mathbb{E} [(\bar{\gamma}^2)^4] = \mathbb{E} \left[ \left( \frac{y + \bar{\eta}}{\mathbf{a}^\top \Sigma^* \mathbf{a}} \right)^4 \right] \quad (41)$$

$$\leq (y + \bar{\eta})^4 \cdot \mathbb{E} \left[ \left( \frac{1}{\mathbf{a}^\top \Sigma^* \mathbf{a}} \right)^4 \right]. \quad (42)$$

582 It therefore suffices to bound the fourth moment of  $\frac{1}{\mathbf{a}^\top \Sigma^* \mathbf{a}}$ , which is done in Lemma 3. Therefore,

$$\mathbb{E} \left[ \left( \frac{1}{\mathbf{a}^\top \Sigma^* \mathbf{a}} \right)^4 \right] \lesssim \left( \frac{1}{\sigma_r r} \right)^4, \quad (43)$$

583 as desired.

## 584 C Proof of Theorem 1

585 Our goal is to derive finite sample error bounds for the estimator in Equation (8). For our estimator,  
 586 if the regularization parameter is set to be sufficiently large (which we will characterize later), then  
 587 the error matrix is guaranteed to be in some *error set*  $\mathcal{E}$ . For rank  $r$  symmetric positive semidefinite  
 588 matrices, the error set  $\mathcal{E}$  can be characterized as [24]

$$\mathcal{E} = \left\{ \mathbf{U} \in \mathbb{S}^{d \times d} : \|\mathbf{U}\|_* \leq 4\sqrt{2r} \|\mathbf{U}\|_F \right\}, \quad (44)$$

589 where recall that  $\mathbb{S}^{d \times d}$  denotes the set of symmetric  $d \times d$  matrices.

590 A key condition for estimation under these settings is to ensure that the shrunken sensing matrices  
 591 satisfy a restricted strong convexity (RSC) condition over the error set  $\mathcal{E}$ . That is, we must show that  
 592 there exists some positive constant  $\kappa$  such that

$$\frac{1}{n} \sum_{i=1}^n \langle \tilde{\mathbf{A}}_i, \mathbf{U} \rangle^2 \geq \kappa \|\mathbf{U}\|_F^2 \quad \text{for all } \mathbf{U} \in \mathcal{E}. \quad (45)$$

593 We begin by stating a proposition that characterizes the deterministic upper bound on the estimation  
 594 error.

595 **Proposition 1** ([39, Theorem 1] with  $q = 0$ ). *Suppose that  $\Sigma^*$  has rank  $r$  and the shrunken sensing  
 596 matrices satisfy the restricted strong convexity condition with positive constant  $\kappa$ . Then if the  
 597 regularization parameter satisfies*

$$\lambda_n \geq 2 \left\| \frac{1}{n} \sum_{i=1}^n y \tilde{\mathbf{A}}_i - \frac{1}{n} \sum_{i=1}^n \langle \tilde{\mathbf{A}}_i, \Sigma^* \rangle \tilde{\mathbf{A}}_i \right\|_{\text{op}} \quad (46a)$$

598 any optimal solution  $\hat{\Sigma}$  of the optimization program (8) satisfies

$$\|\hat{\Sigma} - \Sigma^*\|_F \leq \frac{32\sqrt{r}\lambda_n}{\kappa} \quad (46b)$$

This theorem is a special case of Theorem 1 in [39], which is in turn adapted from Theorem 1 in [24] (see [24] or [39] for the proof). Proposition 1 is a deterministic and nonasymptotic result and provides a roadmap for proving upper bounds. First, we show that the operator norm (46a) can be upper bounded with high probability, allowing us to set the regularization parameter  $\lambda_n$  accordingly. Second, we show that the RSC condition (45) is satisfied with high probability. We begin by bounding the operator norm (46a) in the following proposition.

**Proposition 2.** *Let  $y^\uparrow = y + \eta^\uparrow$ . Suppose that  $\Sigma^*$  has rank  $r$ , with  $r > 8$ . Then there exists a positive absolute constant  $C$  such that the bound*

$$\left\| \frac{1}{n} \sum_{i=1}^n y \tilde{\mathbf{A}}_i - \frac{1}{n} \sum_{i=1}^n \langle \tilde{\mathbf{A}}_i, \Sigma^* \rangle \tilde{\mathbf{A}}_i \right\|_{\text{op}} \leq C y^\uparrow \left( \frac{y^\uparrow}{\sigma_r r} \sqrt{\frac{d}{n}} + \frac{d}{n} \tau + \left( \frac{y^\uparrow}{\sigma_r r} \right)^2 \frac{1}{\tau} + \frac{1}{\sigma_r r} \frac{\nu_\eta^2}{m} \right) \quad (47)$$

holds with probability at least  $1 - 4 \exp(-d)$ .

The proof of Proposition 2 is provided in Appendix C.1. Next, we show that the RSC condition (45) is satisfied with high probability, as is done in the following proposition.

**Proposition 3.** *Let  $\kappa_y$  be the median of  $y + \bar{\eta}$  and let  $\mathcal{E}$  be the error set defined in Eq. (44). Suppose that the truncation threshold  $\tau$  satisfies  $\tau \geq \frac{\kappa_y}{\text{tr}(\Sigma^*)}$ . Then, there exist positive absolute constants  $\kappa_{\mathcal{L}}$ ,  $c$ , and  $C$  such that if the number of effective measurements satisfy*

$$n \geq C r d \quad (48a)$$

then we have

$$\frac{1}{n} \sum_{i=1}^n \langle \tilde{\mathbf{A}}_i, \mathbf{U} \rangle^2 \geq \kappa_{\mathcal{L}} \left( \frac{\kappa_y}{\text{tr}(\Sigma^*)} \right)^2 \|\mathbf{U}\|_F^2 \quad (48b)$$

simultaneously for all matrices  $\mathbf{U} \in \mathcal{E}$  with probability greater than  $1 - \exp(-cn)$ .

The proof of Proposition 3 is provided in Appendix C.2. We now utilize the results of Propositions 1, 2 and 3 to derive our final error bounds. By Proposition 2, we know that the operator norm (46a) can be upper bounded with high probability. We set the regularization parameter  $\lambda_n$  to satisfy

$$\lambda_n \geq C_1 y^\uparrow \left( \frac{y^\uparrow}{\sigma_r r} \sqrt{\frac{d}{n}} + \frac{d}{n} \tau + \left( \frac{y^\uparrow}{\sigma_r r} \right)^2 \frac{1}{\tau} + \frac{1}{\sigma_r r} \frac{\nu_\eta^2}{m} \right). \quad (49)$$

for an appropriate constant  $C_1$ . Furthermore, by Proposition 3, we have that there exists some universal constant  $C_2$  such that if the number of effective measurements satisfies  $n \geq C_2 r d$ , the RSC condition also holds for constant  $\kappa = \kappa_{\mathcal{L}} \left( \frac{\kappa_y}{\text{tr}(\Sigma^*)} \right)^2$  with high probability. Taking a union bound, we have that Proposition 2 and Proposition 3 hold simultaneously with probability at least  $1 - 4 \exp(-d) - \exp(-cn)$ . By Proposition 1, the bound

$$\|\hat{\Sigma} - \Sigma^*\|_F \leq 32 \sqrt{r} \frac{\lambda_n}{\kappa_{\mathcal{L}} \left( \frac{\kappa_y}{\text{tr}(\Sigma^*)} \right)^2} \quad (50)$$

$$\leq C \left( \frac{\text{tr}(\Sigma^*)}{\kappa_y} \right)^2 \sqrt{r} \lambda_n \quad (51)$$

holds with probability at least  $1 - 4 \exp(-d) - \exp(-cn)$ , as desired. Above, we have defined  $C = \frac{32}{\kappa_{\mathcal{L}}}$ .

## C.1 Proof of Proposition 2

Our goal is to derive an upper bound on the operator norm

$$\left\| \frac{1}{n} \sum_{i=1}^n y \tilde{\mathbf{A}}_i - \frac{1}{n} \sum_{i=1}^n \langle \tilde{\mathbf{A}}_i, \Sigma^* \rangle \tilde{\mathbf{A}}_i \right\|_{\text{op}}. \quad (52)$$

627 **Step 1: decompose the error into five terms.** We begin by adding and subtracting multiple quantities,  
 628 as done below.

$$\begin{aligned} \frac{1}{n} \sum_{i=1}^n y \tilde{\mathbf{A}}_i - \frac{1}{n} \sum_{i=1}^n \langle \tilde{\mathbf{A}}_i, \boldsymbol{\Sigma}^* \rangle \tilde{\mathbf{A}}_i &= \frac{1}{n} \sum_{i=1}^n y \tilde{\mathbf{A}}_i - \mathbb{E} [y \tilde{\mathbf{A}}] + \mathbb{E} [y \tilde{\mathbf{A}}] - \mathbb{E} [y \tilde{\mathbf{A}}] \\ &\quad + \mathbb{E} [y \tilde{\mathbf{A}}] - \mathbb{E} [\langle \tilde{\mathbf{A}}, \boldsymbol{\Sigma}^* \rangle \tilde{\mathbf{A}}] + \mathbb{E} [\langle \tilde{\mathbf{A}}, \boldsymbol{\Sigma}^* \rangle \tilde{\mathbf{A}}] - \frac{1}{n} \sum_{i=1}^n \langle \tilde{\mathbf{A}}_i, \boldsymbol{\Sigma}^* \rangle \tilde{\mathbf{A}}_i \end{aligned} \quad (53)$$

$$\begin{aligned} &\stackrel{(i)}{=} \frac{1}{n} \sum_{i=1}^n y \tilde{\mathbf{A}}_i - \mathbb{E} [y \tilde{\mathbf{A}}] + \mathbb{E} [y \tilde{\mathbf{A}}] - \mathbb{E} [y \tilde{\mathbf{A}}] \\ &\quad + \mathbb{E} [\langle \tilde{\mathbf{A}}, \boldsymbol{\Sigma}^* \rangle \tilde{\mathbf{A}}] - \mathbb{E} [\langle \tilde{\mathbf{A}}, \boldsymbol{\Sigma}^* \rangle \tilde{\mathbf{A}}] - \mathbb{E} [\bar{\eta} \tilde{\mathbf{A}}] \\ &\quad + \mathbb{E} [\langle \tilde{\mathbf{A}}, \boldsymbol{\Sigma}^* \rangle \tilde{\mathbf{A}}] - \frac{1}{n} \sum_{i=1}^n \langle \tilde{\mathbf{A}}_i, \boldsymbol{\Sigma}^* \rangle \tilde{\mathbf{A}}_i. \end{aligned} \quad (54)$$

629 Above, (i) follows from substituting in  $\langle \tilde{\mathbf{A}}, \boldsymbol{\Sigma}^* \rangle - \bar{\eta}$  for  $y$  for the  $\mathbb{E} [y \tilde{\mathbf{A}}]$  term. To obtain our final  
 630 bound, we bound the following operator norms.

$$\begin{aligned} \left\| \frac{1}{n} \sum_{i=1}^n y \tilde{\mathbf{A}}_i - \frac{1}{n} \sum_{i=1}^n \langle \tilde{\mathbf{A}}_i, \boldsymbol{\Sigma}^* \rangle \tilde{\mathbf{A}}_i \right\|_{\text{op}} &\leq y \underbrace{\left\| \frac{1}{n} \sum_{i=1}^n \tilde{\mathbf{A}}_i - \mathbb{E} [\tilde{\mathbf{A}}] \right\|_{\text{op}}}_{\text{Term 1}} \\ &\quad + y \underbrace{\left\| \mathbb{E} [\tilde{\mathbf{A}}] - \mathbb{E} [\tilde{\mathbf{A}}] \right\|_{\text{op}}}_{\text{Term 2}} \\ &\quad + \underbrace{\left\| \mathbb{E} [\langle \tilde{\mathbf{A}}, \boldsymbol{\Sigma}^* \rangle \tilde{\mathbf{A}}] - \mathbb{E} [\langle \tilde{\mathbf{A}}, \boldsymbol{\Sigma}^* \rangle \tilde{\mathbf{A}}] \right\|_{\text{op}}}_{\text{Term 3}} \\ &\quad + \underbrace{\left\| \mathbb{E} [\langle \tilde{\mathbf{A}}, \boldsymbol{\Sigma}^* \rangle \tilde{\mathbf{A}}] - \frac{1}{n} \sum_{i=1}^n \langle \tilde{\mathbf{A}}_i, \boldsymbol{\Sigma}^* \rangle \tilde{\mathbf{A}}_i \right\|_{\text{op}}}_{\text{Term 4}} \\ &\quad + \underbrace{\left\| \mathbb{E} [\bar{\eta} \tilde{\mathbf{A}}] \right\|_{\text{op}}}_{\text{Term 5}}. \end{aligned} \quad (55)$$

631 In the remaining proof, we bound the five terms in (55) individually. We first discuss the nature of  
 632 the five terms.

- 633 • **Terms 1 and 4:** These two terms characterize the difference between the empirical mean  
 634 of quantities involving  $\tilde{\mathbf{A}}$  and their true expectation. In the proof, we show that the em-  
 635 pirical mean concentrates around the expectation with high probability (see Lemma 5 and  
 636 Lemma 8).
- 637 • **Terms 2 and 3:** These two terms characterize the difference in expectation introduced by  
 638 truncating  $\tilde{\mathbf{A}}$  to  $\tilde{\mathbf{A}}$ . Hence, these two terms characterize biases that arise from truncation.  
 639 In the proof, these two terms diminish as  $\tau \rightarrow \infty$  (see Lemma 6 and Lemma 7). Note that  
 640 setting  $\tau$  to  $\infty$  is equivalent to no thresholding, and in this case  $\tilde{\mathbf{A}}$  becomes identical to  $\tilde{\mathbf{A}}$ ,  
 641 and both terms diminish.
- 642 • **Term 5:** Term 5 is a bias term that arises from the fact that the mean of the noise  $\eta$   
 643 conditioned on sensing matrix  $\tilde{\mathbf{A}}$  is non-zero:  $\mathbb{E} [\bar{\eta} | \tilde{\mathbf{A}}] \neq 0$ . We will show that this bias  
 644 scales like  $\frac{1}{m}$ , allowing us to set the averaging number  $m$  to obtain consistent estimation.

645 By setting the truncation threshold  $\tau$  carefully, we can make the Term 3 and 4 biases the same order  
 646 as Terms 1 and 4.

647 **Step 2: bound the five terms individually.** In what follows, we provide five lemmas to bound each of  
 648 the five terms individually. In the proofs of the five lemmas, we rely on an upper bound on the fourth  
 649 moment of the  $m$ -sample averaged measurements  $\bar{\gamma}^2$ . Recall from Lemma 4 in Appendix B.5 that  
 650 we have  $\mathbb{E}[(\bar{\gamma}^2)^4] \leq M = c \left( \frac{y+\eta^\dagger}{\sigma_r r} \right)^4$ . We also rely heavily on the following truncation properties  
 651 relating the  $m$ -sample averaged measurements  $\bar{\gamma}^2$  and truncated measurements  $\tilde{\gamma}^2$ :

$$\tilde{\gamma}_i^2 \leq \tau \quad (\text{TP1})$$

$$\tilde{\gamma}_i^2 \leq \bar{\gamma}_i^2 \quad (\text{TP2})$$

$$\bar{\gamma}_i^2 - \tilde{\gamma}_i^2 = (\bar{\gamma}_i^2 - \tilde{\gamma}_i^2) \cdot \mathbf{1}_{\{\bar{\gamma}_i^2 \geq \tau\}}. \quad (\text{TP3})$$

652 The following lemma provides a bound for Term 1.

653 **Lemma 5.** Let  $\tilde{\mathbf{A}}_1, \dots, \tilde{\mathbf{A}}_n$  be i.i.d copies of a random matrix  $\tilde{\mathbf{A}}$  as defined in Eq. (14). There exists  
 654 a universal constant  $c > 0$  such that the following is true. For any  $t > 0$ , we have

$$\left\| \frac{1}{n} \sum_{i=1}^n \tilde{\mathbf{A}}_i - \mathbb{E}[\tilde{\mathbf{A}}] \right\|_{\text{op}} \lesssim \sqrt{\frac{M^{1/2}t}{n}} + \frac{\tau t}{n} \quad (56)$$

655 with probability at least  $1 - 2 \cdot 9^d \cdot \exp(-t)$ .

656 The proof of Lemma 5 is provided in Appendix D.1. The next lemma provides a deterministic upper  
 657 bound for Term 2.

658 **Lemma 6.** Let  $\bar{\mathbf{A}}$  and  $\tilde{\mathbf{A}}$  be the random matrices defined in Eq. (13) and Eq. (14), respectively. Then  
 659 the bound

$$\left\| \mathbb{E}[\tilde{\mathbf{A}}] - \mathbb{E}[\bar{\mathbf{A}}] \right\|_{\text{op}} \lesssim \frac{M^{1/2}}{\tau} \quad (57)$$

660 holds.

661 The proof of Lemma 6 is provided in Appendix D.2. The following lemma provides a deterministic  
 662 upper bound for Term 3.

663 **Lemma 7.** Let  $\bar{\mathbf{A}}$  and  $\tilde{\mathbf{A}}$  be the random matrices defined in Eq. (13) and Eq. (14), respectively. Then  
 664 the bound

$$\left\| \mathbb{E}[\langle \bar{\mathbf{A}}, \Sigma^* \rangle \bar{\mathbf{A}}] - \mathbb{E}[\langle \tilde{\mathbf{A}}, \Sigma^* \rangle \tilde{\mathbf{A}}] \right\|_{\text{op}} \lesssim \frac{(y + \eta^\dagger) M^{1/2}}{\tau} \quad (58)$$

665 holds.

666 The proof of Lemma 7 is provided in Appendix D.3. The following lemma provides a bound for  
 667 Term 4.

668 **Lemma 8.** Let  $\tilde{\mathbf{A}}_1, \dots, \tilde{\mathbf{A}}_n$  be i.i.d copies of a random matrix  $\tilde{\mathbf{A}}$  as defined in Eq. (14). There exists  
 669 a universal constant  $c > 0$  such that the following is true. For any  $t > 0$ , we have

$$\left\| \mathbb{E}[\langle \tilde{\mathbf{A}}, \Sigma^* \rangle \tilde{\mathbf{A}}] - \frac{1}{n} \sum_{i=1}^n \langle \tilde{\mathbf{A}}_i, \Sigma^* \rangle \tilde{\mathbf{A}}_i \right\|_{\text{op}} \lesssim (y + \eta^\dagger) \left( \sqrt{\frac{M^{1/2}t}{n}} + \frac{\tau t}{n} \right) \quad (59)$$

670 with probability at least  $1 - 2 \cdot 9^d \cdot \exp(-t)$ .

671 The proof of Lemma 8 is provided in Appendix D.4. We note that Terms 2 and 3 are bias that result  
 672 from shrinkage, but crucially are inversely dependent on the shrinkage threshold  $\tau$ . This fact allows  
 673 us to set  $\tau$  so that the order of Terms 2 and 3 match the order of Terms 1 and 4. In particular, with the  
 674 choice of  $\tau = M^{1/4} \sqrt{\frac{n}{d}}$ , all terms are of order  $M^{1/4} \sqrt{\frac{d}{n}}$ .

675 The final lemma bounds Term 5, which is a bias that arises from the dependence of the sensing matrix  
 676  $\bar{\mathbf{A}}$  on the noise  $\eta$ .

677 **Lemma 9.** Let  $\bar{\mathbf{A}}$  be the random matrix defined in Eq. (13). Suppose that  $\Sigma^*$  has rank  $r$  with  $r > 2$ .  
 678 Then we have

$$\mathbb{E}[\|\bar{\eta} \bar{\mathbf{A}}\|_{\text{op}}] \lesssim \frac{1}{\sigma_r r} \frac{\nu_\eta^2}{m}. \quad (60)$$



The proof of Lemma 9 is provided in Appendix D.5. We note that the bias scales with the variance of the  $m$ -sample averaged noise  $\bar{\eta}$ , which scales inversely with  $m$ .

**Step 3: combine the five terms.** We set  $t = (\log 9 + 1)d$  and denote  $y^\dagger = y + \eta^\dagger$ . Utilizing Lemmas 5–9, we arrive at an upper bound for the operator norm. We have that with probability at least  $1 - 4\exp(-d)$ ,

$$\left\| \frac{1}{n} \sum_{i=1}^n y \tilde{\mathbf{A}}_i - \frac{1}{n} \sum_{i=1}^n \langle \tilde{\mathbf{A}}_i, \Sigma^* \rangle \tilde{\mathbf{A}}_i \right\|_{\text{op}} \lesssim (y^\dagger + 1) \left( \sqrt{\frac{M^{1/2}d}{n}} + \frac{d}{n}\tau + \frac{M^{1/2}}{\tau} \right) + \frac{1}{\sigma_r r} \frac{\nu_\eta^2}{m} \quad (61)$$

$$\stackrel{(i)}{\lesssim} y^\dagger \left( \frac{y^\dagger}{\sigma_r r} \sqrt{\frac{d}{n}} + \frac{d}{n}\tau + \left( \frac{y^\dagger}{\sigma_r r} \right)^2 \frac{1}{\tau} + \frac{1}{\sigma_r r} \frac{\nu_\eta^2}{m} \right) \quad (62)$$

as desired. Above, (i) follows from substituting in the expression for  $M$  from Lemma 4.

## C.2 Proof of Proposition 3

Our objective is to show that there exists some constant  $\kappa$  such that the RSC condition

$$\frac{1}{n} \sum_{i=1}^n \langle \tilde{\mathbf{A}}_i, \mathbf{U} \rangle^2 \geq \kappa \|\mathbf{U}\|_F^2 \quad (63)$$

holds uniformly for all matrices  $\mathbf{U}$  in the error set

$$\mathcal{E} = \left\{ \mathbf{U} \in \mathbb{S}^{d \times d} : \|\mathbf{U}\|_* \leq 4\sqrt{2r}\|\mathbf{U}\|_F \right\}. \quad (64)$$

Recall from the definition of  $\tilde{\mathbf{A}}$  that

$$\tilde{\mathbf{A}}_i = \tilde{\gamma}_i^2 \mathbf{a}_i \mathbf{a}_i^\top \quad (65)$$

$$= \left( \frac{y + \bar{\eta}_i}{\mathbf{a}_i^\top \Sigma^* \mathbf{a}_i} \wedge \tau \right) \mathbf{a}_i \mathbf{a}_i^\top \quad (66)$$

so we have

$$\langle \tilde{\mathbf{A}}_i, \mathbf{U} \rangle^2 = \left( \frac{y + \bar{\eta}_i}{\mathbf{a}_i^\top \Sigma^* \mathbf{a}_i} \wedge \tau \right)^4 (\mathbf{a}_i^\top \mathbf{U} \mathbf{a}_i)^2.$$

This implies that  $\sum_{i=1}^n \langle \tilde{\mathbf{A}}_i, \mathbf{U} \rangle^2$  is nondecreasing in  $\tau$  when  $\tau > 0$ . As a result, defining the random matrix

$$\tilde{\mathbf{A}}^{\tau'} = \left( \frac{y + \bar{\eta}}{\mathbf{a}^\top \Sigma^* \mathbf{a}} \wedge \tau' \right) \mathbf{a} \mathbf{a}^\top, \quad (67)$$

we have that the following lower bound holds for any  $\tau' \leq \tau$ .

$$\frac{1}{n} \sum_{i=1}^n \langle \tilde{\mathbf{A}}_i, \mathbf{U} \rangle^2 \geq \frac{1}{n} \sum_{i=1}^n \langle \tilde{\mathbf{A}}_i^{\tau'}, \mathbf{U} \rangle^2. \quad (68)$$

Above  $\tilde{\mathbf{A}}_1^{\tau'}, \dots, \tilde{\mathbf{A}}_n^{\tau'}$  are i.i.d copies of the random matrix (67). We will lower bound  $\frac{1}{n} \sum_{i=1}^n \langle \tilde{\mathbf{A}}_i^{\tau'}, \mathbf{U} \rangle^2$  for an appropriate value of  $\tau'$ , which we will set later. To proceed, we will use a small-ball argument [46, 47] based on the following lemma.

**Lemma 10** ([47, Proposition 5.1], adapted to our notation). *Let  $\mathbf{X}_1, \dots, \mathbf{X}_n \in \mathbb{R}^{d \times d}$  be i.i.d. copies of a random matrix  $\mathbf{X} \in \mathbb{R}^{d \times d}$ . Let  $E \subset \mathbb{R}^{d \times d}$ . Let  $\xi, Q > 0$  be such that for every  $\mathbf{U} \in E$ ,*

$$\mathbb{P}(|\langle \mathbf{X}, \mathbf{U} \rangle| \geq 2\xi) \geq Q. \quad (69)$$

Furthermore, denote the Rademacher width as

$$W = \mathbb{E} \left[ \sup_{\mathbf{U} \in E} \frac{1}{n} \sum_{i=1}^n \varepsilon_i \langle \mathbf{X}_i, \mathbf{U} \rangle \right],$$

where  $\varepsilon_1, \dots, \varepsilon_n$  are i.i.d. Rademacher random variables independent of the  $\mathbf{X}_i$ 's. Then, for any  $t > 0$ , with probability at least  $1 - \exp\left(-\frac{nt^2}{2}\right)$ ,

$$\inf_{\mathbf{U} \in E} \left( \frac{1}{n} \sum_{i=1}^n \langle \mathbf{X}_i, \mathbf{U} \rangle^2 \right)^{1/2} \geq \xi(Q - t) - 2W.$$

We apply Lemma 10 with  $\mathbf{X}_i = \tilde{\mathbf{A}}_i^{\tau'}$  and with set  $E$  as

$$E = \mathcal{E} \cap \{\mathbf{U} \in \mathbb{R}^{d \times d} : \|\mathbf{U}\|_F = 1\} \quad (70)$$

$$= \{\mathbf{U} \in \mathbb{S}^{d \times d} : \|\mathbf{U}\|_F = 1, \|\mathbf{U}\|_* \leq 4\sqrt{2r}\} \quad (71)$$

The rest of the proof is comprised of two key steps. To invoke Lemma 10, the first step establishes the inequality (69) by lower bounding  $Q$ . The second step upper bounds the Rademacher width  $W$ . The following lemma provides the lower bound on  $Q$ .

**Lemma 11.** Consider any  $\tau' \in (0, \tau)$ . There exist absolute constants  $c_1, c_2 > 0$  such that for every  $\mathbf{U} \in E$ , we have

$$\mathbb{P} \left( \left| \langle \tilde{\mathbf{A}}^{\tau'}, \mathbf{U} \rangle \right| \geq c_1 \left( \frac{\kappa_y}{\text{tr}(\mathbf{\Sigma}^*)} \wedge \tau' \right) \right) \geq c_2. \quad (72)$$

The proof of Lemma 11 is presented in Appendix E.1. We now turn to the second step of the proof, which is bounding the Rademacher width  $W$ . The next lemma characterizes this width.

**Lemma 12.** Consider any  $\tau' \in (0, \tau)$ . Let  $\tilde{\mathbf{A}}_1^{\tau'}, \dots, \tilde{\mathbf{A}}_n^{\tau'} \in \mathbb{R}^{d \times d}$  be i.i.d. copies of the random matrix  $\tilde{\mathbf{A}}^{\tau'} \in \mathbb{R}^{d \times d}$  defined in Equation (67). Let  $E$  be the set defined in Equation (71). Then, there exists some absolute constants  $c_1$  and  $c_2$  such that if

$$n \geq c_1 d \quad (73a)$$

the bound

$$\mathbb{E} \left[ \sup_{\mathbf{U} \in E} \frac{1}{n} \sum_{i=1}^n \varepsilon_i \langle \tilde{\mathbf{A}}_i^{\tau'}, \mathbf{U} \rangle \right] \leq c_2 \tau' \sqrt{\frac{rd}{n}} \quad (73b)$$

holds.

The proof of Lemma 12 is presented in Appendix E.2. Invoking Lemma 11 and Lemma 12, we have that for some constant  $c_4$ , as long as  $n \geq c_4 d$ , the bound

$$\begin{aligned} \inf_{\mathbf{U} \in E} \left( \frac{1}{n} \sum_{i=1}^n \langle \tilde{\mathbf{A}}_i, \mathbf{U} \rangle^2 \right)^{1/2} &\geq \inf_{\mathbf{U} \in E} \left( \frac{1}{n} \sum_{i=1}^n \langle \tilde{\mathbf{A}}_i^{\tau'}, \mathbf{U} \rangle^2 \right)^{1/2} \\ &\geq c'_1 \left( \frac{\kappa_y}{\text{tr}(\mathbf{\Sigma}^*)} \wedge \tau' \right) (c_2 - t) - c_3 \tau' \sqrt{\frac{rd}{n}} \end{aligned} \quad (74)$$

with probability at least  $1 - \exp\left(-\frac{nt^2}{2}\right)$ . We set  $\tau' = \frac{\kappa_y}{\text{tr}(\mathbf{\Sigma}^*)}$ , where  $\kappa_y$  is the median of the random quantity  $y + \bar{\eta}$ . By the assumption  $\tau \geq \frac{\kappa_y}{\text{tr}(\mathbf{\Sigma}^*)}$ , this choice of  $\tau'$  satisfies  $\tau' \leq \tau$ . Setting  $t = \frac{c_2}{2}$ , we have for some constant  $c$ , that with probability at least  $1 - \exp(-cn)$ ,

$$\inf_{\mathbf{U} \in E} \frac{1}{n} \left( \sum_{i=1}^n \langle \tilde{\mathbf{A}}_i^{\tau'}, \mathbf{U} \rangle^2 \right)^{1/2} \geq \frac{c'_1 c_2}{2} \frac{\kappa_y}{\text{tr}(\mathbf{\Sigma}^*)} - c_3 \frac{\kappa_y}{\text{tr}(\mathbf{\Sigma}^*)} \sqrt{\frac{rd}{n}}. \quad (75)$$

Therefore, if  $n \geq \max \left\{ \left( \frac{4c_3}{c'_1 c_2} \right)^2, c_4 \right\} rd$ , we have

$$\inf_{\mathbf{U} \in \mathcal{E}} \frac{1}{n} \sum_{i=1}^n \langle \tilde{\mathbf{A}}_i, \mathbf{U} \rangle^2 \geq \left( \frac{c'_1 c_2}{4} \frac{\kappa_y}{\text{tr}(\mathbf{\Sigma}^*)} \right)^2 \|\mathbf{U}\|_F^2 \quad (76)$$

with probability at least  $1 - \exp(-cn)$ . We conclude by setting  $\kappa_{\mathcal{L}} = \left( \frac{c'_1 c_2}{4} \right)^2$  and  $C =$

$$\max \left\{ \left( \frac{4c_3}{c'_1 c_2} \right)^2, c_4 \right\}.$$

## D Proof of supporting lemmas for Proposition 2

In this section, we prove the supporting lemmas for Proposition 2.

### D.1 Proof of Lemma 5

Let  $\mathcal{S}_{\frac{1}{4}} \subseteq \mathcal{S}^{d-1}$  be a  $\frac{1}{4}$ -covering of unit-norm  $d$ -dimensional vectors. By a covering argument [43, Exercise 4.4.3], for any symmetric matrix  $U \in \mathbb{R}^{d \times d}$ , its operator norm is bounded by  $\|U\|_{\text{op}} \leq 2 \sup_{\mathbf{v} \in \mathcal{S}_{\frac{1}{4}}} |\mathbf{v}^\top U \mathbf{v}|$ . Hence, we have

$$\begin{aligned} \left\| \frac{1}{n} \sum_{i=1}^n \tilde{\mathbf{A}}_i - \mathbb{E}[\tilde{\mathbf{A}}] \right\|_{\text{op}} &\leq 2 \sup_{\mathbf{v} \in \mathcal{S}_{\frac{1}{4}}} \left| \mathbf{v}^\top \left( \frac{1}{n} \sum_{i=1}^n \tilde{\mathbf{A}}_i - \mathbb{E}[\tilde{\mathbf{A}}] \right) \mathbf{v} \right| \\ &= 2 \sup_{\mathbf{v} \in \mathcal{S}_{\frac{1}{4}}} \left| \frac{1}{n} \sum_{i=1}^n \mathbf{v}^\top \tilde{\mathbf{A}}_i \mathbf{v} - \mathbb{E}[\mathbf{v}^\top \tilde{\mathbf{A}} \mathbf{v}] \right|. \end{aligned} \quad (77)$$

We now apply Bernstein's inequality to bound (77). We first assume the Bernstein condition holds with  $u_1 = c_1 M^{\frac{1}{2}}$  and  $u_2 = c_2 \tau$  for some universal positive constants  $c_1, c_2$ . Namely, for each integer  $p \geq 2$ , we show that for any unit vector  $\mathbf{v} \in \mathbb{R}^d$ ,

$$\mathbb{E} \left[ |\mathbf{v}^\top \tilde{\mathbf{A}} \mathbf{v}|^p \right] \leq \frac{p!}{2} u_1 u_2^{p-2}. \quad (78)$$

We first provide the rest of the proof assuming that (78) holds, followed by proving (78). By Bernstein's inequality (see Lemma 2), under condition (78), we have that for any unit vector  $\mathbf{v} \in \mathbb{R}^d$  and any  $t > 0$ ,

$$\mathbb{P} \left( \left| \frac{1}{n} \sum_{i=1}^n \mathbf{v}^\top \tilde{\mathbf{A}}_i \mathbf{v} - \mathbb{E}[\mathbf{v}^\top \tilde{\mathbf{A}} \mathbf{v}] \right| \geq 2 \left( \sqrt{\frac{u_1 M^{1/2} t}{n}} + \frac{u_2 \tau t}{n} \right) \right) \leq 2 \exp(-t). \quad (79)$$

By Vershynin [43, Corollary 4.2.13], the cardinality of the covering set  $\mathcal{S}_{\frac{1}{4}}$  is bounded above by  $9^d$ . Therefore, by a union bound,

$$\mathbb{P} \left( \sup_{\mathbf{v} \in \mathcal{S}_{\frac{1}{4}}} \left| \frac{1}{n} \sum_{i=1}^n \mathbf{v}^\top \tilde{\mathbf{A}}_i \mathbf{v} - \mathbb{E}[\mathbf{v}^\top \tilde{\mathbf{A}} \mathbf{v}] \right| \geq 2 \left( \sqrt{\frac{u_1 M^{1/2} t}{n}} + \frac{u_2 \tau t}{n} \right) \right) \leq 2 \cdot 9^d \cdot \exp(-t). \quad (80)$$

Combining (77) and (80), for any  $t > 0$ , we have

$$\left\| \frac{1}{n} \sum_{i=1}^n \tilde{\mathbf{A}}_i - \mathbb{E}[\tilde{\mathbf{A}}] \right\|_{\text{op}} \lesssim \sqrt{\frac{M^{1/2} t}{n}} + \frac{\tau t}{n} \quad (81)$$

with probability at least  $1 - 2 \cdot 9^d \cdot \exp(-t)$ , as desired. It remains to prove the Bernstein condition (78).

**Proving the Bernstein condition (78) holds.** We fix any unit vector  $\mathbf{v} \in \mathbb{R}^d$ . Plugging in  $\tilde{\mathbf{A}} = \tilde{\gamma}^2 \mathbf{a} \mathbf{a}^\top$ , we have  $\mathbf{v}^\top \tilde{\mathbf{A}} \mathbf{v} = \tilde{\gamma}^2 (\mathbf{v}^\top \mathbf{a})^2$ . Since the random variable  $\mathbf{a} \sim \mathcal{N}(\mathbf{0}, \mathbf{I}_d)$ , and  $\mathbf{v}$  is a unit vector, it follows that  $\mathbf{v}^\top \mathbf{a} \sim \mathcal{N}(0, 1)$ . Denote by  $G \sim \mathcal{N}(0, 1)$  a standard normal random variable. For any integer  $p \geq 2$ , we have

$$\begin{aligned} \mathbb{E}[\mathbf{v}^\top \tilde{\mathbf{A}} \mathbf{v}]^p &= \mathbb{E}[(\tilde{\gamma}^2 G^2)^p] \stackrel{(i)}{\leq} \tau^{p-2} \mathbb{E}[(\tilde{\gamma}^2)^2 G^{2p}] \\ &\stackrel{(ii)}{\leq} \tau^{p-2} \cdot \mathbb{E}[(\tilde{\gamma}^2)^2 G^{2p}] \\ &\stackrel{(iii)}{\leq} \tau^{p-2} \left( \mathbb{E}[(\tilde{\gamma}^2)^4] \cdot \mathbb{E}[G^{4p}] \right)^{1/2} \\ &\stackrel{(iv)}{\leq} \tau^{p-2} (M \cdot \mathbb{E}[G^{4p}])^{1/2}, \end{aligned} \quad (82)$$

where steps (i) and (ii) follow from [TP1](#) and [TP2](#) respectively, step (iii) follows from Cauchy–Schwarz, and step (iv) follows from the upper bound on the fourth moment of  $\tilde{\gamma}^2$ . Note that  $G^2$  follows a Chi-Square distribution with 1 degree of freedom, and hence sub-exponential. Recall from [\(17\)](#) in Appendix [B.2](#) that there exists some constant  $c > 0$  such that we have  $(\mathbb{E}[(G^2)^p])^{1/p} \leq cp$  for all  $p \geq 1$ . Hence, we have

$$\begin{aligned} (\mathbb{E}[G^{4p}])^{1/2} &\leq (2cp)^p = (2ec)^p \cdot \left(\frac{p}{e}\right)^p \\ &\stackrel{(i)}{<} p! \cdot (2ec)^p \end{aligned} \quad (83)$$

where step (i) is true by Stirling’s inequality that for all  $p \geq 1$ ,

$$p! > \sqrt{2\pi p} \left(\frac{p}{e}\right)^p e^{\frac{1}{12p+1}} > \left(\frac{p}{e}\right)^p.$$

Plugging [\(83\)](#) to [\(82\)](#) and rearranging terms completes the proof of Bernstein condition [\(78\)](#).

## D.2 Proof of Lemma [6](#)

We first begin by showing that  $\mathbb{E}[\bar{\mathbf{A}}] - \mathbb{E}[\tilde{\mathbf{A}}] \succeq \mathbf{0}$ . Substituting in the definitions of  $\bar{\mathbf{A}}$  and  $\tilde{\mathbf{A}}$ , we have  $\mathbb{E}[\bar{\mathbf{A}}] - \mathbb{E}[\tilde{\mathbf{A}}] = \mathbb{E}[(\tilde{\gamma}^2 - \gamma^2)\mathbf{a}\mathbf{a}^\top]$ . By [TP2](#), we have  $\tilde{\gamma}^2 \geq \gamma^2$ , meaning that  $\tilde{\gamma}^2 - \gamma^2$  is non-negative. The expectation of a non-negative quantity times an outer product is symmetric positive semidefinite. Therefore, we can write the operator norm as

$$\|\mathbb{E}[\tilde{\mathbf{A}}] - \mathbb{E}[\bar{\mathbf{A}}]\|_{\text{op}} = \sup_{\mathbf{v} \in \mathcal{S}^{d-1}} \mathbf{v}^\top (\mathbb{E}[\bar{\mathbf{A}}] - \mathbb{E}[\tilde{\mathbf{A}}]) \mathbf{v}. \quad (84)$$

We now show that there exists a uniform upper bound on the quantity

$$\mathbf{v}^\top (\mathbb{E}[\bar{\mathbf{A}}] - \mathbb{E}[\tilde{\mathbf{A}}]) \mathbf{v} \quad (85)$$

for a unit-norm  $d$ -dimensional vector  $\mathbf{v}$ , therefore bounding the operator norm. We again note  $(\mathbf{v}^\top \mathbf{a}) \sim \mathcal{N}(0, 1)$  and denote  $G \sim \mathcal{N}(0, 1)$ . Then we rewrite the quantity [\(85\)](#) by substituting in the expression for sensing matrices  $\bar{\mathbf{A}}$  and  $\tilde{\mathbf{A}}$ , as follows.

$$\mathbf{v}^\top (\mathbb{E}[\bar{\mathbf{A}}] - \mathbb{E}[\tilde{\mathbf{A}}]) \mathbf{v} = \mathbb{E}[\mathbf{v}^\top (\bar{\mathbf{A}} - \tilde{\mathbf{A}}) \mathbf{v}] \quad (86)$$

$$= \mathbb{E}[\mathbf{v}^\top (\tilde{\gamma}^2 \mathbf{a}\mathbf{a}^\top - \gamma^2 \mathbf{a}\mathbf{a}^\top) \mathbf{v}] \quad (87)$$

$$= \mathbb{E}[(\tilde{\gamma}^2 - \gamma^2) G^2]. \quad (88)$$

We continue from here by utilizing properties of the shrunken measurements, as follows.

$$\mathbb{E}[(\tilde{\gamma}^2 - \gamma^2) G^2] \stackrel{(i)}{=} \mathbb{E}[(\tilde{\gamma}^2 - \gamma^2) G^2 \mathbf{1}\{\tilde{\gamma}^2 \geq \tau\}] \quad (89)$$

$$\leq \mathbb{E}[\tilde{\gamma}^2 G^2 \mathbf{1}\{\tilde{\gamma}^2 \geq \tau\}] \quad (90)$$

$$\stackrel{(ii)}{\leq} \left( \mathbb{E}[(\tilde{\gamma}^2 G^2)^2] \cdot \mathbb{E}[\mathbf{1}\{\tilde{\gamma}^2 \geq \tau\}] \right)^{1/2} \quad (91)$$

$$\stackrel{(iii)}{\leq} \left( \mathbb{E}[|\tilde{\gamma}^2|^4] \cdot \mathbb{E}[|G^2|^4] \right)^{1/4} \left( \mathbb{P}(\tilde{\gamma}^2 \geq \tau) \right)^{1/2}, \quad (92)$$

where step (i) follows from [TP3](#), and (ii) and (iii) follow from Cauchy–Schwarz. We proceed by bounding each of the above terms separately. First, recall from Lemma [4](#) in Appendix [B.5](#) that the fourth moment  $\mathbb{E}[|\tilde{\gamma}^2|^4]$  is bounded above by  $M$ . Second,  $G^2$  is a sub-exponential random variable. By Appendix [B.2](#), we have that  $\mathbb{E}[|G^2|^4]^{1/4} \leq c$  for some constant  $c$ . It remains to bound  $\left( \mathbb{P}(\tilde{\gamma}^2 \geq \tau) \right)^{1/2}$ , which we do below.

$$\left( \mathbb{P}(\tilde{\gamma}^2 \geq \tau) \right)^{1/2} \stackrel{(iv)}{\leq} \left( \frac{\mathbb{E}[|\tilde{\gamma}^2|^2]}{\tau^2} \right)^{1/2} \quad (93)$$

$$\stackrel{(v)}{\leq} \frac{(\mathbb{E}[|\tilde{\gamma}^2|^4])^{1/4}}{\tau} \quad (94)$$

$$\stackrel{(vi)}{\leq} \frac{M^{1/4}}{\tau}. \quad (95)$$

764 Above, (iv) follows from Markov's inequality, (v) follows from Cauchy–Schwarz, and (vi) follows  
 765 from the fourth moment bound on the averaged scaling  $\bar{\gamma}^2$ . Putting everything together, we have that  
 766 the bound

$$\mathbf{v}^\top \left( \mathbb{E} [\bar{\mathbf{A}}] - \mathbb{E} [\tilde{\mathbf{A}}] \right) \mathbf{v} \lesssim \frac{M^{1/2}}{\tau} \quad (96)$$

767 holds uniformly for all vectors  $\mathbf{v} \in \mathcal{S}^{d-1}$ . Therefore,

$$\left\| \mathbb{E} [\tilde{\mathbf{A}}] - \mathbb{E} [\bar{\mathbf{A}}] \right\|_{\text{op}} \lesssim \frac{M^{1/2}}{\tau}, \quad (97)$$

768 as desired

### 769 D.3 Proof of Lemma 7

770 We begin by substituting in the definition  $\bar{\mathbf{A}} = \bar{\gamma}^2 \mathbf{a} \mathbf{a}^\top$ , the matrix  $\langle \bar{\mathbf{A}}, \Sigma^* \rangle \bar{\mathbf{A}}$  can be written as  
 771  $\bar{\gamma}^4 \mathbf{a}^\top \Sigma^* \mathbf{a}$ . Similarly, we can re-write the matrix  $\langle \tilde{\mathbf{A}}, \Sigma^* \rangle \tilde{\mathbf{A}}$  as  $\tilde{\gamma}^4 (\mathbf{a}^\top \Sigma^* \mathbf{a}) \mathbf{a} \mathbf{a}^\top$ . Therefore, our  
 772 goal is to bound the operator norm

$$\left\| (\bar{\gamma}^4 - \tilde{\gamma}^4) (\mathbf{a}^\top \Sigma^* \mathbf{a}) \mathbf{a} \mathbf{a}^\top \right\|_{\text{op}} \quad (98)$$

773 We note that the matrix  $(\bar{\gamma}^4 - \tilde{\gamma}^4) (\mathbf{a}^\top \Sigma^* \mathbf{a}) \mathbf{a} \mathbf{a}^\top$  is symmetric positive semidefinite, as it is the  
 774 product of a non-negative scalar  $(\bar{\gamma}^4 - \tilde{\gamma}^4) (\mathbf{a}^\top \Sigma^* \mathbf{a})$  and an outer product. Similar to the proof of  
 775 Lemma 6, we now show a uniform upper bound on the quantity  $\mathbf{v}^\top \mathbb{E} [(\bar{\gamma}^4 - \tilde{\gamma}^4) (\mathbf{a}^\top \Sigma^* \mathbf{a}) \mathbf{a} \mathbf{a}^\top] \mathbf{v}$   
 776 for arbitrary unit-norm  $d$ -dimensional vector  $\mathbf{v}$ .

777 Again, note that  $\mathbf{v}^\top \mathbf{a} \sim \mathcal{N}(0, 1)$  and denote  $G \sim \mathcal{N}(0, 1)$ . We begin by substituting in the  
 778 expressions for  $G$ .

$$\mathbf{v}^\top \mathbb{E} [(\bar{\gamma}^4 - \tilde{\gamma}^4) (\mathbf{a}^\top \Sigma^* \mathbf{a}) \mathbf{a} \mathbf{a}^\top] \mathbf{v} = \mathbb{E} [(\bar{\gamma}^4 - \tilde{\gamma}^4) (\mathbf{a}^\top \Sigma^* \mathbf{a}) \mathbf{v}^\top \mathbf{a} \mathbf{a}^\top \mathbf{v}] \quad (99)$$

$$= \mathbb{E} [(\bar{\gamma}^4 - \tilde{\gamma}^4) (\mathbf{a}^\top \Sigma^* \mathbf{a}) G^2] \quad (100)$$

779 Next, we can proceed by manipulating the  $\bar{\gamma}^4 - \tilde{\gamma}^4$  term to remove the term  $\mathbf{a}^\top \Sigma^* \mathbf{a}$ , as follows.

$$\mathbb{E} [(\bar{\gamma}^4 - \tilde{\gamma}^4) (\mathbf{a}^\top \Sigma^* \mathbf{a}) G^2 \mathbf{1}\{\gamma^2 \geq \tau\}] = \mathbb{E} [(\bar{\gamma}^2 + \tilde{\gamma}^2) (\bar{\gamma}^2 - \tilde{\gamma}^2) (\mathbf{a}^\top \Sigma^* \mathbf{a}) G^2] \quad (101)$$

$$\stackrel{(i)}{\leq} \mathbb{E} [2\bar{\gamma}^2 (\bar{\gamma}^2 - \tilde{\gamma}^2) (\mathbf{a}^\top \Sigma^* \mathbf{a}) G^2] \quad (102)$$

$$\stackrel{(ii)}{=} 2\mathbb{E} [(y + \bar{\eta}) (\bar{\gamma}^2 - \tilde{\gamma}^2) G^2] \quad (103)$$

$$\stackrel{(iii)}{\leq} 2(y + \eta^\dagger) \mathbb{E} [(\bar{\gamma}^2 - \tilde{\gamma}^2) G^2 \mathbf{1}\{\gamma^2 \geq \tau\}] \quad (104)$$

780 Above, (i) follows from TP2, (ii) follows from the definition  $\bar{\gamma}^2 = \frac{y + \bar{\eta}}{\mathbf{a}^\top \Sigma^* \mathbf{a}}$ , and (iii) follows from  
 781 TP3 and the upper bound on noise  $\eta$ .

782 The rest of the proof follows the exact steps of the proof of Lemma 6, provided in Section D.2  
 783 Therefore, we have the bound

$$\left\| \mathbb{E} [(\bar{\gamma}^4 - \tilde{\gamma}^4) (\mathbf{a}^\top \Sigma^* \mathbf{a}) \mathbf{a} \mathbf{a}^\top] \right\|_{\text{op}} \lesssim \frac{(y + \eta^\dagger) M^{1/2}}{\tau}, \quad (105)$$

784 as desired.

### 785 D.4 Proof of Lemma 8

786 The proof follows the steps as the proof of Lemma 5, and we explain the difference where we now  
 787 provide a Bernstein condition with  $u_1 = c_1(y + \eta^\dagger)^2$  and  $u_2 = c_2(y + \eta^\dagger)\tau$ . Namely, for every  
 788 integer  $p \geq 2$ , we have (cf. 78)

$$\mathbb{E} \left[ \left| \mathbf{v}^\top \langle \tilde{\mathbf{A}}, \Sigma^* \rangle \tilde{\mathbf{A}} \mathbf{v} \right|^p \right] \leq \frac{p!}{2} u_1 u_2^{p-2}. \quad (106)$$

789 Plugging in  $\tilde{\mathbf{A}} = \tilde{\gamma}^2 \mathbf{a} \mathbf{a}^\top$ , we have

$$\begin{aligned} \mathbb{E} \left[ \left| \mathbf{v}^\top \langle \tilde{\mathbf{A}}, \boldsymbol{\Sigma}^* \rangle \tilde{\mathbf{A}} \mathbf{v} \right|^p \right] &= \mathbb{E} \left[ (\tilde{\gamma}^2 \mathbf{a}^\top \boldsymbol{\Sigma}^* \mathbf{a})^p \cdot \left| \mathbf{v}^\top \tilde{\mathbf{A}} \mathbf{v} \right|^p \right] \\ &\stackrel{(i)}{\leq} \mathbb{E} \left[ (\tilde{\gamma}^2 \mathbf{a}^\top \boldsymbol{\Sigma}^* \mathbf{a})^p \cdot \left| \mathbf{v}^\top \tilde{\mathbf{A}} \mathbf{v} \right|^p \right] \end{aligned} \quad (107)$$

$$\stackrel{(ii)}{=} \mathbb{E} \left[ (y + \bar{\eta})^p \cdot \left| \mathbf{v}^\top \tilde{\mathbf{A}} \mathbf{v} \right|^p \right] \quad (108)$$

$$\stackrel{(iii)}{\leq} (y + \eta^\dagger)^p \cdot \mathbb{E} \left[ \left| \mathbf{v}^\top \tilde{\mathbf{A}} \mathbf{v} \right|^p \right]. \quad (109)$$

790 Plugging in (78) from Lemma 5 to bound the term  $\mathbb{E} \left[ \left| \mathbf{v}^\top \tilde{\mathbf{A}} \mathbf{v} \right|^p \right]$  in (109) completes the proof of the  
791 Bernstein condition (106).

792 Above, (i) follows from TP2. (ii) follows from the definition  $\tilde{\gamma}^2 = \frac{y + \bar{\eta}}{\mathbf{a}^\top \boldsymbol{\Sigma}^* \mathbf{a}}$ , and (iii) follows from  
793 the upper bound on the noise  $\eta$ . The rest of the proof follows in the same manner as the proof  
794 of Lemma 5, as presented in Section D.1, with an additional factor of  $y + \eta^\dagger$ . Therefore, like in  
795 Section D.1 the bound

$$\left\| \mathbb{E} \left[ \langle \tilde{\mathbf{A}}, \boldsymbol{\Sigma}^* \rangle \tilde{\mathbf{A}} \right] - \frac{1}{n} \sum_{i=1}^n \langle \tilde{\mathbf{A}}_i, \boldsymbol{\Sigma}^* \rangle \tilde{\mathbf{A}}_i \right\|_{\text{op}} \lesssim (y + \eta^\dagger) \left( \sqrt{\frac{M^{1/2} t}{n}} + \frac{\tau t}{n} \right) \quad (110)$$

796 holds with probability greater than  $1 - 2 \cdot 9^d \cdot \exp(-t)$ , as desired.

## 797 D.5 Proof of Lemma 9

798 Substituting in  $\bar{\mathbf{A}} = \tilde{\gamma}^2 \mathbf{a} \mathbf{a}^\top = \frac{y + \bar{\eta}}{\mathbf{a}^\top \boldsymbol{\Sigma}^* \mathbf{a}} \mathbf{a} \mathbf{a}^\top$ , we have

$$\begin{aligned} \left\| \mathbb{E} [\bar{\mathbf{A}}] \right\|_{\text{op}} &= \left\| \mathbb{E} \left[ \bar{\eta} (y + \bar{\eta}) \frac{\mathbf{a} \mathbf{a}^\top}{\mathbf{a}^\top \boldsymbol{\Sigma}^* \mathbf{a}} \right] \right\|_{\text{op}} \\ &= \left\| \mathbb{E} [\bar{\eta} (y + \bar{\eta})] \cdot \mathbb{E} \left[ \frac{\mathbf{a} \mathbf{a}^\top}{\mathbf{a}^\top \boldsymbol{\Sigma}^* \mathbf{a}} \right] \right\|_{\text{op}} \\ &= \frac{\sigma_{\bar{\eta}}^2}{m} \left\| \mathbb{E} \left[ \frac{\mathbf{a} \mathbf{a}^\top}{\mathbf{a}^\top \boldsymbol{\Sigma}^* \mathbf{a}} \right] \right\|_{\text{op}}. \end{aligned} \quad (111)$$

799 To bound the operator norm term in (111), recall from Lemma 3(b) in Appendix B.4 that for any  
800 matrix  $\mathbf{U}$ , we have

$$\mathbb{E} \left( \frac{\mathbf{a}^\top \mathbf{U} \mathbf{a}}{\mathbf{a}^\top \boldsymbol{\Sigma}^* \mathbf{a}} \right) \lesssim \frac{1}{\sigma_r r} \|\mathbf{U}\|_*. \quad (112)$$

801 Note that  $\frac{\mathbf{a} \mathbf{a}^\top}{\mathbf{a}^\top \boldsymbol{\Sigma}^* \mathbf{a}}$  is symmetric positive semidefinite, so we have

$$\begin{aligned} \left\| \mathbb{E} \left[ \frac{\mathbf{a} \mathbf{a}^\top}{\mathbf{a}^\top \boldsymbol{\Sigma}^* \mathbf{a}} \right] \right\|_{\text{op}} &= \sup_{\mathbf{v} \in \mathcal{S}^{d-1}} \left| \mathbf{v}^\top \mathbb{E} \left[ \frac{\mathbf{a} \mathbf{a}^\top}{\mathbf{a}^\top \boldsymbol{\Sigma}^* \mathbf{a}} \right] \mathbf{v} \right| \\ &= \sup_{\mathbf{v} \in \mathcal{S}^{d-1}} \mathbb{E} \left[ \frac{\mathbf{a}^\top (\mathbf{v} \mathbf{v}^\top) \mathbf{a}}{\mathbf{a}^\top \boldsymbol{\Sigma}^* \mathbf{a}} \right] \\ &\stackrel{(i)}{\lesssim} \frac{1}{\sigma_r r} \sup_{\mathbf{v} \in \mathcal{S}^{d-1}} \|\mathbf{v} \mathbf{v}^\top\|_* \\ &\stackrel{(ii)}{=} \frac{1}{\sigma_r r}, \end{aligned} \quad (113)$$

802 where step (i) is true by plugging in (112), and step (ii) is true because  $\|\mathbf{v} \mathbf{v}^\top\|_* = 1$  for any unit  
803 norm vector  $\mathbf{v}$ . Plugging (113) back to (111), we have

$$\left\| \mathbb{E} [\bar{\mathbf{A}}] \right\|_{\text{op}} \lesssim \frac{1}{\sigma_r r} \cdot \frac{\nu_{\bar{\eta}}^2}{m}, \quad (114)$$

804 as desired.

## 805 E Proof of supporting lemmas for Proposition 3

806 In this section, we prove the supporting lemmas for Proposition 3.

### 807 E.1 Proof of Lemma 11

808 For the proof, we first fix any  $\mathbf{U} \in \mathcal{E} \cap \{\mathbf{U} \in \mathbb{S}^{d \times d} : \|\mathbf{U}\|_F = 1\}$ . Let  $\kappa_y$  be the median of  $y + \bar{\eta}$   
809 and let  $\mathcal{G}$  be the event that  $y + \eta \geq \kappa_y$ , which occurs with probability  $\frac{1}{2}$ . For any  $\xi > 0$ , because the  
810 averaged noise  $\bar{\eta}$  and sensing vector  $\mathbf{a}$  are independent,

$$\mathbb{P}\left(\left|\langle \tilde{\mathbf{A}}^{\tau'}, \mathbf{U} \rangle\right| \geq \xi\right) = \mathbb{P}\left(\left(\frac{y + \eta}{\mathbf{a}^\top \Sigma^* \mathbf{a}} \wedge \tau'\right) |\langle \mathbf{a} \mathbf{a}^\top, \mathbf{U} \rangle| \geq \xi\right) \quad (115)$$

$$= \mathbb{P}\left(\left(\frac{y + \eta}{\mathbf{a}^\top \Sigma^* \mathbf{a}} \wedge \tau'\right) |\langle \mathbf{a} \mathbf{a}^\top, \mathbf{U} \rangle| \geq \xi \middle| \mathcal{G}\right) \mathbb{P}(\mathcal{G}) \quad (116)$$

$$= \frac{1}{2} \mathbb{P}\left(\left(\frac{y + \eta}{\mathbf{a}^\top \Sigma^* \mathbf{a}} \wedge \tau'\right) |\langle \mathbf{a} \mathbf{a}^\top, \mathbf{U} \rangle| \geq \xi \middle| \mathcal{G}\right) \quad (117)$$

$$\geq \frac{1}{2} \mathbb{P}\left(\left(\frac{\kappa_y}{\mathbf{a}^\top \Sigma^* \mathbf{a}} \wedge \tau'\right) |\langle \mathbf{a} \mathbf{a}^\top, \mathbf{U} \rangle| \geq \xi\right) \quad (118)$$

811 We proceed by bounding the terms in (118) separately.

812 **Lower bound on  $\mathbb{P}(|\langle \mathbf{a} \mathbf{a}^\top, \mathbf{U} \rangle| \geq c_1)$ .** We use the approach from [32, Section 4.1]. By Paley-  
813 Zygmund inequality,

$$\mathbb{P}\left(|\langle \mathbf{a} \mathbf{a}^\top, \mathbf{U} \rangle|^2 \geq \frac{1}{2} \mathbb{E}\left[|\langle \mathbf{a} \mathbf{a}^\top, \mathbf{U} \rangle|^2\right]\right) \geq \frac{1}{4} \frac{\left(\mathbb{E}\left[|\langle \mathbf{a} \mathbf{a}^\top, \mathbf{U} \rangle|^2\right]\right)^2}{\mathbb{E}\left[|\langle \mathbf{a} \mathbf{a}^\top, \mathbf{U} \rangle|^4\right]} \quad (119)$$

814 As noted in [32, Section 4.1], there exists some constant  $c'_2$  such that for any matrix  $\mathbf{U}$  with unit  
815 Frobenius norm,

$$\mathbb{E}\left[|\langle \mathbf{a} \mathbf{a}^\top, \mathbf{U} \rangle|^2\right] \geq 1 \quad \text{and} \quad \mathbb{E}\left[|\langle \mathbf{a} \mathbf{a}^\top, \mathbf{U} \rangle|^4\right] \leq c'_2 \left(\mathbb{E}\left[|\langle \mathbf{a} \mathbf{a}^\top, \mathbf{U} \rangle|^2\right]\right)^2. \quad (120)$$

816 Note that by the definition, every matrix  $\mathbf{U} \in \mathcal{E}$  has unit Frobenius norm. Utilizing Paley-  
817 Zygmund (119) and the bounds on the second and fourth moment of  $\langle \mathbf{a} \mathbf{a}^\top, \mathbf{U} \rangle$  (120), there exist  
818 positive constants  $c_1$  and  $c_2$  such that

$$\mathbb{P}\left(|\langle \mathbf{a} \mathbf{a}^\top, \mathbf{U} \rangle| \geq c_1\right) \geq c_2. \quad (121)$$

819 **Upper bound on  $\mathbf{a}^\top \Sigma^* \mathbf{a}$ .** By Hanson-Wright inequality [48, Theorem 1.1], there exist some  
820 positive absolute constants  $c$  and  $c'_3$  such that for any  $t > 0$ , we have

$$\mathbf{a}^\top \Sigma^* \mathbf{a} \leq c'_3 \left(\text{tr}(\Sigma^*) + \|\Sigma^*\|_F \sqrt{t} + \|\Sigma^*\|_{\text{op}} t\right) \quad (122)$$

821 with probability at least  $1 - 2 \exp(-ct)$ . Set  $t$  to be a constant such that  $2 \exp(-ct) = \frac{c_2}{2}$  and note  
822 that for symmetric positive semidefinite matrix  $\Sigma^*$ , the bounds  $\|\Sigma^*\|_F \leq \text{tr}(\Sigma^*)$  and  $\|\Sigma^*\|_{\text{op}} \leq$   
823  $\text{tr}(\Sigma^*)$  hold. As a result, we have that there exists some constant  $c_3$  such that

$$\mathbb{P}\left(\mathbf{a}^\top \Sigma^* \mathbf{a} \leq c_3 \text{tr}(\Sigma^*)\right) \geq 1 - \frac{c_2}{2}. \quad (123)$$

824

825 By a union bound of (121) and (123), we have

$$\begin{aligned} & \mathbb{P}\left(\left(\frac{\kappa_y}{\mathbf{a}^\top \Sigma^* \mathbf{a}} \wedge \tau'\right) |\langle \mathbf{a} \mathbf{a}^\top, \mathbf{U} \rangle| \geq c_1 \left(\frac{\kappa_y}{c_3 \text{tr}(\Sigma^*)} \wedge \tau'\right)\right) \\ & \geq \mathbb{P}\left(\frac{\kappa_y}{\mathbf{a}^\top \Sigma^* \mathbf{a}} \wedge \tau' \geq \frac{\kappa_y}{c_3 \text{tr}(\Sigma^*)} \wedge \tau'\right) + \mathbb{P}\left(|\langle \mathbf{a} \mathbf{a}^\top, \mathbf{U} \rangle| \geq c_1\right) - 1 \\ & \geq \mathbb{P}\left(\frac{\kappa_y}{\mathbf{a}^\top \Sigma^* \mathbf{a}} \geq \frac{\kappa_y}{c_3 \text{tr}(\Sigma^*)}\right) + \mathbb{P}\left(|\langle \mathbf{a} \mathbf{a}^\top, \mathbf{U} \rangle| \geq c_1\right) - 1 \geq \frac{c_2}{2} \end{aligned} \quad (124)$$

826 Redefining constants  $c_1$  and  $c_2$  appropriately, we have

$$\mathbb{P} \left( \left| \langle \tilde{\mathbf{A}}^{\tau'}, \mathbf{U} \rangle \right| \geq c_1 \left( \frac{\kappa_y}{\text{tr}(\mathbf{\Sigma}^*)} \wedge \tau' \right) \right) \geq c_2, \quad (125)$$

827 as desired.

## 828 E.2 Proof of Lemma 12

829 We begin by noting that for any matrix  $\mathbf{U} \in E$ ,

$$\begin{aligned} \mathbb{E} \left[ \sup_{\mathbf{U} \in E} \frac{1}{n} \sum_{i=1}^n \varepsilon_i \langle \tilde{\mathbf{A}}_i^{\tau'}, \mathbf{U} \rangle \right] &\stackrel{(i)}{\leq} \mathbb{E} \left[ \sup_{\mathbf{U} \in E} \left\| \frac{1}{n} \sum_{i=1}^n \varepsilon_i \tilde{\mathbf{A}}_i^{\tau'} \right\|_{\text{op}} \|\mathbf{U}\|_* \right] \\ &\stackrel{(ii)}{\leq} 4\sqrt{2r} \mathbb{E} \left[ \left\| \frac{1}{n} \sum_{i=1}^n \varepsilon_i \tilde{\mathbf{A}}_i^{\tau'} \right\|_{\text{op}} \right], \end{aligned} \quad (126)$$

830 where step (i) follows from Hölder's inequality, and step (ii) follows from the definition of the  
831 set  $E$ . It remains of the proof to bound the expected operator norm in (126). We do this with a  
832 trivial modification of the approaches in [49, Section 5.4.1], [47, Section 8.6], [32, Section 4.1] to  
833 accommodate the bounded term  $\left( \frac{y + \bar{\eta}_i}{\alpha_i^\top \mathbf{\Sigma}^* \alpha_i} \wedge \tau' \right)$  that appears in each of the matrices  $\tilde{\mathbf{A}}_i^{\tau'}$ . As a result,  
834 there exist universal constants  $c_1$  and  $c_2$  such that if  $n$  satisfies  $n \geq c_2 d$ , then the bound

$$\mathbb{E} \left[ \left\| \frac{1}{n} \sum_{i=1}^n \varepsilon_i \tilde{\mathbf{A}}_i^{\tau'} \right\|_{\text{op}} \right] \leq c_1 \tau' \sqrt{\frac{d}{n}} \quad (127)$$

835 holds. We conclude by re-defining  $c_1$  appropriately.

## 836 F Proof of Corollary 1

837 The proof consists of two steps. We first verify that the choices of the averaging parameter  $m$  and  
838 truncation threshold  $\tau$  as

$$m = \left\lfloor \left( \frac{(\nu_\eta^2)^2 N}{d} \right)^{1/3} \right\rfloor \quad \text{and} \quad \tau = \frac{y^\uparrow}{\sigma_r r} \sqrt{\frac{N}{md}}, \quad (128)$$

839 satisfy the assumptions  $n \gtrsim rd$  and  $\tau \geq \frac{\kappa_y}{\text{tr}(\mathbf{\Sigma}^*)}$ . We then invoke Theorem 1.

840 **Verifying the condition on  $n$ .** We have

$$\begin{aligned} n &= \frac{N}{m} \\ &\stackrel{(i)}{=} N \left( \frac{(\nu_\eta^2)^2 N}{d} \right)^{-1/3} \\ &= \left( N^2 \frac{d}{(\nu_\eta^2)^2} \right)^{1/3} \end{aligned} \quad (129)$$

$$\stackrel{(ii)}{\gtrsim} \left( (\nu_\eta^2)^2 r^3 d^2 \frac{d}{(\nu_\eta^2)^2} \right)^{1/3} \quad (130)$$

$$= rd, \quad (131)$$

841 where step (i) is true by plugging in the choice of  $m$  from (128), and step (ii) is true by plugging in  
842 the assumption  $N \gtrsim \nu_\eta^2 r^{3/2} d$ . Thus the condition  $n \gtrsim rd$  of Theorem 1 is satisfied.



843 **Verifying the condition on  $\tau$ .** For the term  $\sqrt{\frac{N}{dm}}$  in the expression of  $\tau$  in (128), note that, by the  
844 previous point,  $\frac{N}{m} = n \gtrsim rd$  (with a constant that, WLOG and by necessity, is greater than 1). Thus  
845  $\sqrt{\frac{N}{dm}} \geq \sqrt{r} > 1$ . Therefore, it suffices to verify that

$$\frac{y^\dagger}{\sigma_r r} \geq \frac{\kappa_y}{\text{tr}(\Sigma^*)}. \quad (132)$$

846 By definition, we have  $y^\dagger \geq \kappa_y$ . Furthermore, since  $\Sigma^*$  is symmetric positive semidefinite, its  
847 eigenvalues are all non-negative and are the same as singular values, and hence  $\sigma_r r \leq \text{tr}(\Sigma^*)$ .  
848 Therefore, we have (132) holds, verifying the condition on  $\tau$ .

849 **Invoking Theorem 1.** By setting  $\lambda_n$  to its lower bound in (9) and substituting in  $n = N/m$  and  
850 our choice of  $\tau$  from (128), we have

$$\lambda_n = C_1 \frac{(y^\dagger)^2}{\sigma_r r} \left( \sqrt{\frac{md}{N}} + \frac{\nu_\eta^2}{m} \right). \quad (133)$$

851 Substituting in our choice of  $m$  from (128), we have

$$\lambda_n = C_1 \frac{(y^\dagger)^2}{\sigma_r r} \left( \frac{\nu_\eta^2 d}{N} \right)^{1/3}. \quad (134)$$

852 Substituting this expression for  $\lambda_n$  into the error bound (10) and absorbing  $C_1$  into the constant  $C$ ,  
853 we have

$$\|\widehat{\Sigma} - \Sigma^*\|_F \leq C \left( \frac{\text{tr}(\Sigma^*)^2}{\sigma_r r} \right) \left( \frac{y^\dagger}{\kappa_y} \right)^2 \sqrt{r} \left( \frac{\nu_\eta^2 d}{N} \right)^{1/3}. \quad (135)$$

854 Using the fact that  $\text{tr}(\Sigma^*) \leq \sigma_1 r$ , we have

$$\|\widehat{\Sigma} - \Sigma^*\|_F \leq C \left( \frac{\sigma_1^2}{\sigma_r} \right) \left( \frac{y^\dagger}{\kappa_y} \right)^2 r^{3/2} \left( \frac{\nu_\eta^2 d}{N} \right)^{1/3}, \quad (136)$$

855 as desired.

## 856 G Choice of value $y$

857 In this section, we discuss the scale-invariance of the learning from PAQs problem in more de-  
858 tail. Under the Mahalanobis model for human perception, there exists some ground truth metric—  
859 parameterized by  $\Sigma^*$ —that governs perception. Associated with  $\Sigma^*$ , is a (squared) distance  $y_*$  such  
860 that for any two items  $\mathbf{x}$  and  $\mathbf{x}' \in \mathbb{R}^d$ ,  $\mathbf{x}, \mathbf{x}'$  are perceived to be similar if  $\|\mathbf{x} - \mathbf{x}'\|_{\Sigma^*}^2 < y_*$  and  
861 dissimilar if  $\|\mathbf{x} - \mathbf{x}'\|_{\Sigma^*}^2 > y_*$ .

862 Our two-stage estimator for learning with PAQs assumes that the value of  $y_*$  is known, which  
863 practitioners are unlikely to know *a priori*. However, this is not an issue in practice due to *scale-*  
864 *invariance*. That is, for any constant  $c > 0$ , if we use  $y = cy_*$  in our estimation procedure, we will  
865 recover a scaled metric  $c\Sigma^*$ . Therefore, by to the scale-invariance of the problem, we may set  $y$  to  
866 any positive value without loss of generality. In the main paper, for ease of exposition, we assume  
867 that  $\Sigma^*$  is the metric associated with the user's choice for  $y$ , and derive estimation error bounds for  
868 this metric.

## References

- [1] William L. Rankin and Joel W. Grube. A comparison of ranking and rating procedures for value system measurement. *European Journal of Social Psychology*, 10(3):233–246, 1980.
- [2] Anne-Wil Harzing, Joyce Baldueza, Wilhelm Barner-Rasmussen, Cordula Barzantny, Anne Canabal, Anabella Davila, Alvaro Espejo, Rita Ferreira, Axele Giroud, Kathrin Koester, Yung-Kuei Liang, Audra Mockaitis, Michael J. Morley, Barbara Myloni, Joseph O.T. Odusanya, Sharon Leiba O’Sullivan, Ananda Kumar Palaniappan, Paulo Prochno, Srabani Roy Choudhury, Ayse Saka-Helmhout, Sununta Siengthai, Linda Viswat, Ayda Uzuncarsili Soydas, and Lena Zander. Rating versus ranking: What is the best way to reduce response and language bias in cross-national research? *International Business Review*, 18(4):417–432, 2009. ISSN 0969-5931.
- [3] Georgios N. Yannakakis and John Hallam. Ranking vs. preference: A comparative study of self-reporting. In Sidney D’Mello, Arthur Graesser, Björn Schuller, and Jean-Claude Martin, editors, *Affective Computing and Intelligent Interaction*, pages 437–446, Berlin, Heidelberg, 2011. Springer Berlin Heidelberg. ISBN 978-3-642-24600-5.
- [4] Nihar B. Shah, Joseph K Bradley, Abhay Parekh, Martin Wainwright, and Kannan Ramchandran. A case for ordinal peer-evaluation in MOOCs. In *NIPS Workshop on Data Driven Education*, 2013.
- [5] Karthik Raman and Thorsten Joachims. Methods for ordinal peer grading. In *Proceedings of the 20th ACM SIGKDD International Conference on Knowledge Discovery and Data Mining*, KDD ’14, page 1037–1046, New York, NY, USA, 2014. Association for Computing Machinery. ISBN 9781450329569.
- [6] Richard D. Goffin and James M. Olson. Is it all relative? Comparative judgments and the possible improvement of self-ratings and ratings of others. *Perspectives on Psychological Science*, 6(1):48–60, 2011.
- [7] Nihar B. Shah, Sivaraman Balakrishnan, Joseph Bradley, Abhay Parekh, Kannan Ramch, ran, and Martin J. Wainwright. Estimation from pairwise comparisons: Sharp minimax bounds with topology dependence. *Journal of Machine Learning Research*, 17(58):1–47, 2016.
- [8] Jingyan Wang and Nihar B. Shah. Your 2 is my 1, your 3 is my 9: Handling arbitrary miscalibrations in ratings. In *Proceedings of the 18th International Conference on Autonomous Agents and MultiAgent Systems*, AAMAS ’19, page 864–872, Richland, SC, 2019. International Foundation for Autonomous Agents and Multiagent Systems.
- [9] Dale Griffin and Lyle Brenner. *Perspectives on Probability Judgment Calibration*, chapter 9. Wiley-Blackwell, 2008. ISBN 9780470752937.
- [10] Polina Harik, Brian Clauser, Irina Grabovsky, Ronald Nungester, David Swanson, and Ratna Nandakumar. An examination of rater drift within a generalizability theory framework. *Journal of Educational Measurement*, 46:43–58, 2009.
- [11] Carol M. Myford and Edward W. Wolfe. Monitoring rater performance over time: A framework for detecting differential accuracy and differential scale category use. *Journal of Educational Measurement*, 46(4):371–389, 2009.
- [12] Gregory Canal, Stefano Fenu, and Christopher Rozell. Active ordinal querying for tuplewise similarity learning. In *The Thirty-Fourth AAAI Conference on Artificial Intelligence (AAAI)*, pages 3332–3340. AAAI Press, 2020.
- [13] Aurélien Bellet, Amaury Habrard, and Marc Sebban. Metric learning synthesis lectures on artificial intelligence and machine learning. *Morgan & Claypool Publishers, San Rafael*, 1:2, 2015.
- [14] Yiming Ying, Kaizhu Huang, and Colin Campbell. Sparse metric learning via smooth optimization. *Advances in neural information processing systems*, 22, 2009.

- [15] Wei Bian and Dacheng Tao. Constrained empirical risk minimization framework for distance metric learning. *IEEE transactions on neural networks and learning systems*, 23(8):1194–1205, 2012.
- [16] Zheng-Chu Guo and Yiming Ying. Guaranteed classification via regularized similarity learning. *Neural computation*, 26(3):497–522, 2014.
- [17] Aurélien Bellet and Amaury Habrard. Robustness and generalization for metric learning. *Neurocomputing*, 151:259–267, 2015.
- [18] Blake Mason, Lalit Jain, and Robert Nowak. Learning low-dimensional metrics. *Advances in neural information processing systems*, 30, 2017.
- [19] Austin Xu and Mark Davenport. Simultaneous preference and metric learning from paired comparisons. *Advances in Neural Information Processing Systems*, 33, 2020.
- [20] Gregory Canal, Blake Mason, Ramya Korlakai Vinayak, and Robert D Nowak. One for all: Simultaneous metric and preference learning over multiple users. In *Advances in Neural Information Processing Systems*, 2022.
- [21] Ian Goodfellow, Jean Pouget-Abadie, Mehdi Mirza, Bing Xu, David Warde-Farley, Sherjil Ozair, Aaron Courville, and Yoshua Bengio. Generative Adversarial Nets. 2014.
- [22] Tero Karras, Samuli Laine, Miika Aittala, Janne Hellsten, Jaakko Lehtinen, and Timo Aila. Analyzing and improving the image quality of stylegan. In *Proceedings of the IEEE/CVF conference on computer vision and pattern recognition*, pages 8110–8119, 2020.
- [23] Benjamin Recht, Maryam Fazel, and Pablo A Parrilo. Guaranteed minimum-rank solutions of linear matrix equations via nuclear norm minimization. *SIAM review*, 52(3):471–501, 2010.
- [24] Sahand Negahban and Martin J Wainwright. Estimation of (near) low-rank matrices with noise and high-dimensional scaling. *The Annals of Statistics*, 39(2):1069–1097, 2011.
- [25] A Tsybakov and A Rohde. Estimation of high-dimensional low-rank matrices. *Annals of Statistics*, 39(2):887–930, 2011.
- [26] Emmanuel J Candes and Yaniv Plan. Tight oracle inequalities for low-rank matrix recovery from a minimal number of noisy random measurements. *IEEE Transactions on Information Theory*, 57(4):2342–2359, 2011.
- [27] Sahand N Negahban, Pradeep Ravikumar, Martin J Wainwright, and Bin Yu. A unified framework for high-dimensional analysis of m-estimators with decomposable regularizers. 2012.
- [28] T Tony Cai and Anru Zhang. Sparse representation of a polytope and recovery of sparse signals and low-rank matrices. *IEEE transactions on information theory*, 60(1):122–132, 2013.
- [29] Mark A Davenport and Justin Romberg. An overview of low-rank matrix recovery from incomplete observations. *IEEE Journal of Selected Topics in Signal Processing*, 10(4):608–622, 2016.
- [30] T Tony Cai and Anru Zhang. Rop: Matrix recovery via rank-one projections. *The Annals of Statistics*, 43(1):102–138, 2015.
- [31] Yuxin Chen, Yuejie Chi, and Andrea J Goldsmith. Exact and stable covariance estimation from quadratic sampling via convex programming. *IEEE Transactions on Information Theory*, 61(7):4034–4059, 2015.
- [32] Richard Kueng, Holger Rauhut, and Ulrich Terstiege. Low rank matrix recovery from rank one measurements. *Applied and Computational Harmonic Analysis*, 42(1):88–116, 2017.
- [33] Andrew D McRae, Justin Romberg, and Mark A Davenport. Optimal convex lifted sparse phase retrieval and pca with an atomic matrix norm regularizer. *IEEE Transactions on Information Theory*, 2022.

- 431 [34] Po-Ling Loh. Statistical consistency and asymptotic normality for high-dimensional robust  
432 m-estimators. 2017.
- 433 [35] Jianqing Fan, Qiefeng Li, and Yuyan Wang. Estimation of high dimensional mean regression  
434 in the absence of symmetry and light tail assumptions. *Journal of the Royal Statistical Society.  
435 Series B, Statistical methodology*, 79(1):247, 2017.
- 436 [36] Arkadij Semenovič Nemirovskij and David Borisovich Yudin. Problem complexity and method  
437 efficiency in optimization. 1983.
- 438 [37] Stanislav Minsker. Geometric median and robust estimation in banach spaces. 2015.
- 439 [38] Daniel Hsu and Sivan Sabato. Loss minimization and parameter estimation with heavy tails.  
440 *The Journal of Machine Learning Research*, 17(1):543–582, 2016.
- 441 [39] Jianqing Fan, Weichen Wang, and Ziwei Zhu. A shrinkage principle for heavy-tailed data:  
442 High-dimensional robust low-rank matrix recovery. *Annals of statistics*, 49(3):1239, 2021.
- 443 [40] Sahand Negahban and Martin J Wainwright. Restricted strong convexity and weighted matrix  
444 completion: Optimal bounds with noise. *The Journal of Machine Learning Research*, 13(1):  
445 1665–1697, 2012.
- 446 [41] Steven Diamond and Stephen Boyd. CVXPY: A Python-embedded modeling language for  
447 convex optimization. *Journal of Machine Learning Research*, 17(83):1–5, 2016.
- 448 [42] Akshay Agrawal, Robin Verschueren, Steven Diamond, and Stephen Boyd. A rewriting system  
449 for convex optimization problems. *Journal of Control and Decision*, 5(1):42–60, 2018.
- 450 [43] Roman Vershynin. *High-dimensional probability: An introduction with applications in data  
451 science*, volume 47. Cambridge university press, 2018.
- 452 [44] Stéphane Boucheron, Gábor Lugosi, and Pascal Massart. *Concentration inequalities: A  
453 nonasymptotic theory of independence*. Oxford university press, 2013.
- 454 [45] Yong Bao and Raymond Kan. On the moments of ratios of quadratic forms in normal random  
455 variables. *Journal of Multivariate Analysis*, 117:229–245, 2013.
- 456 [46] Shahar Mendelson. Learning without concentration. *Journal of the ACM (JACM)*, 62(3):1–25,  
457 2015.
- 458 [47] Joel A Tropp. Convex recovery of a structured signal from independent random linear measure-  
459 ments. In *Sampling Theory, a Renaissance*, pages 67–101. Springer, 2015.
- 460 [48] Mark Rudelson and Roman Vershynin. Hanson-wright inequality and sub-gaussian concentra-  
461 tion. *Electronic Communications in Probability*, 18:1–9, 2013.
- 462 [49] Roman Vershynin. Introduction to the non-asymptotic analysis of random matrices. *arXiv  
463 preprint arXiv:1011.3027*, 2010.
